# Supplementary material for: Effectiveness of systematically delivered evidence-based home safety promotion to improve child home safety practices: a controlled before-and-after study
Source: PubMed Central journal article supplement — Inj Prev. 2023 Jan 31;29(3):227–33. doi: 10.1136/ip-2022-044745 (PMC10313983; doi:10.1136/ip-2022-044745), 2023-01-31
Supplement: ip-2022-044745supp001.pdf [file ip-2022-044745supp001.pdf]

## Supplementary materials

### Supplementary materials S1: Retention strategies

- Pre-notification of the arrival of questionnaires via participant newsletters
  - These were emailed to all participants who supplied working email addresses (approximately 90%) a month before participants were due to receive 12-month or 24-month follow-up questionnaires
- Having multiple contact methods for participants and regularly asking for change of address details
- Providing multiple ways of completing questionnaires (postal, email, phone)
- Repeat mailing and/or emailing of questionnaires
  - When participants did not complete a questionnaire, this was done one then two months after the questionnaires had been sent
- Text and phone reminders
  - These were sent at the time of 12-month and 24-month questionnaires (and, where applicable, when repeat mailing of these was done) being posted
- Shorter questionnaires for final reminders
  - For the third cohort, following the above reminders for the 24-month questionnaires, a shortened questionnaire was sent as part of a third reminder
- Family mentor and health visiting team encouragement to complete questionnaires
- Gift vouchers for questionnaire completion
- Association with a university and local community health care provider
- Careful timing of electronic communication (not during busy times such as lunchtime or bedtime)
- Branding of questionnaires to be appealing to parents

**Supplementary Materials S2: Outcomes and related questionnaire items**

| <b>Primary or secondary outcome</b>       | <b>Measure</b>                 | <b>Measurement time point</b>                                           | <b>Questionnaire items used</b>                                                              | <b>Possible responses</b> |
|-------------------------------------------|--------------------------------|-------------------------------------------------------------------------|----------------------------------------------------------------------------------------------|---------------------------|
| Primary outcome (all three being adopted) | Working smoke alarm            | Baseline, 12 months, 24 months                                          | Do you have any smoke alarms in your home?                                                   | Yes                       |
|                                           |                                |                                                                         |                                                                                              | No                        |
|                                           |                                |                                                                         | If yes, how many of them are fitted and working? (by fitted we mean attached to the ceiling) | 1                         |
|                                           |                                |                                                                         |                                                                                              | 2                         |
|                                           |                                |                                                                         |                                                                                              | 3 or more                 |
|                                           |                                |                                                                         |                                                                                              | Don't know                |
| Storing poisons out of reach              | Baseline, 12 months, 24 months | Do you keep any medicines or cleaning products in drawers or cupboards? | Yes                                                                                          |                           |
|                                           |                                |                                                                         | No                                                                                           |                           |

|    |  |  |                                                                                       |                                                   |                                          |     |
|----|--|--|---------------------------------------------------------------------------------------|---------------------------------------------------|------------------------------------------|-----|
|    |  |  | If yes, how many of these cupboards or drawers have catches or locks on?              | All                                               |                                          |     |
|    |  |  |                                                                                       | Some                                              |                                          |     |
|    |  |  |                                                                                       | None                                              |                                          |     |
|    |  |  |                                                                                       | Don't know                                        |                                          |     |
|    |  |  | At what level do you keep your medicines and cleaning products (tick all that apply)? | Floor level                                       |                                          |     |
|    |  |  |                                                                                       | On worktop or between worktop and adult eye level |                                          |     |
|    |  |  |                                                                                       | At adult eye level or above                       |                                          |     |
|    |  |  | Has a stairgate or no stairs                                                          | Baseline, 12 months, 24 months                    | Do you have stairs in your home?         | Yes |
|    |  |  |                                                                                       |                                                   |                                          | No  |
|    |  |  |                                                                                       |                                                   | Do you have any stairgates in your home? | Yes |
| No |  |  |                                                                                       |                                                   |                                          |     |

|                   |                                             |                                |                                                                                                                                                                             |          |
|-------------------|---------------------------------------------|--------------------------------|-----------------------------------------------------------------------------------------------------------------------------------------------------------------------------|----------|
| Secondary outcome | Supervised bathing                          | Baseline, 12 months, 24 months | In the last week, when something unexpected has happened, e.g. the doorbell or phone has rung, have you ever left your baby(/toddler) alone in the bath, even for a moment? | Yes      |
|                   |                                             |                                |                                                                                                                                                                             | No       |
|                   |                                             |                                |                                                                                                                                                                             | Not sure |
| Secondary outcome | Blind cords out of reach                    | 12 months, 24 months           | Do you have blinds with cords?                                                                                                                                              | Yes      |
|                   |                                             |                                |                                                                                                                                                                             | No       |
|                   |                                             |                                | Do you always tie up the cord or use a winder to keep cords out of reach?                                                                                                   | Yes      |
|                   |                                             |                                |                                                                                                                                                                             | No       |
| Secondary outcome | Using a fireguard or not having a home fire | 12 months, 24 months           | Do you have a fire in your home?                                                                                                                                            | Yes      |
|                   |                                             |                                |                                                                                                                                                                             | No       |
|                   |                                             |                                | Do you have a fireguard?                                                                                                                                                    | Yes      |
|                   |                                             |                                |                                                                                                                                                                             | No       |
|                   |                                             |                                | Do you use the fireguard?                                                                                                                                                   | Yes      |
|                   | No                                          |                                |                                                                                                                                                                             |          |

|                   |                               |                      |                                                                                                 |         |
|-------------------|-------------------------------|----------------------|-------------------------------------------------------------------------------------------------|---------|
| Secondary outcome | Safety catches on any windows | 12 months, 24 months | Do you have any safety catches on your windows that would stop a child or toddler climbing out? | Yes     |
|                   |                               |                      |                                                                                                 | No      |
| Secondary outcome | Fire escape plan              | 12 months, 24 months | Have you made a plan for how to get out of your house if there is a fire?                       | Yes     |
|                   |                               |                      |                                                                                                 | No      |
| Secondary outcome | Outdoor supervision           | 24 months            | Do you have a garden or outside area to play in?                                                | Yes     |
|                   |                               |                      |                                                                                                 | No      |
|                   |                               |                      | When your toddler plays outside, how often do you go with them?                                 | Always  |
|                   |                               |                      |                                                                                                 | Usually |
| Sometimes         |                               |                      |                                                                                                 |         |
| Almost never      |                               |                      |                                                                                                 |         |

|                   |                      |                                           |                                                                                                                                                                                         |                                   |
|-------------------|----------------------|-------------------------------------------|-----------------------------------------------------------------------------------------------------------------------------------------------------------------------------------------|-----------------------------------|
| Secondary outcome | Injuries             | Every 3 months from baseline to 24 months | In the last 3 months, has your toddler had an accident in your home or garden which was treated by a GP, at a hospital accident and emergency department or urgent care/walk in centre? | Yes                               |
|                   |                      |                                           |                                                                                                                                                                                         | No                                |
|                   |                      |                                           | If yes, how many accidents has your toddler had?                                                                                                                                        | 1                                 |
|                   |                      |                                           |                                                                                                                                                                                         | 2                                 |
|                   | 3 or more            |                                           |                                                                                                                                                                                         |                                   |
| Secondary outcome | Medical presentation | Every 3 months from baseline to 24 months | Where did you take your toddler because of this accident (tick all that apply)?*                                                                                                        | GP                                |
|                   |                      |                                           |                                                                                                                                                                                         | Accident and emergency department |

|                   |                    |                                           |                                                                                     |                            |
|-------------------|--------------------|-------------------------------------------|-------------------------------------------------------------------------------------|----------------------------|
|                   |                    |                                           |                                                                                     | Urgent care/walk in centre |
| Secondary outcome | Hospital admission | Every 3 months from baseline to 24 months | Did your toddler stay in hospital for at least one night because of this accident?* | Yes                        |
|                   |                    |                                           |                                                                                     | No                         |

\*The injury questionnaires allowed reporting details of up of to 3 accidents

†Item was on the baseline questionnaire, but was not the 12-month or 24-month follow-up questionnaire

**Supplementary Materials S3: Baseline characteristics of those who continued to participate and those who dropped out**

| Variable              | Those who completed baseline questionnaire and did not complete the 12-month or 24-month questionnaire ( <i>n</i> = 169) |                            | Those who completed baseline questionnaire and a 12-month, a 24-month questionnaire, or both ( <i>n</i> = 593) |            | Statistical test                           |
|-----------------------|--------------------------------------------------------------------------------------------------------------------------|----------------------------|----------------------------------------------------------------------------------------------------------------|------------|--------------------------------------------|
|                       | Median*                                                                                                                  | Interquartile range (IQR)* | Median*                                                                                                        | IQR*       |                                            |
| Child age (months)    | 4.5 [4]                                                                                                                  | 3.4 to 6.3                 | 4.7 [7]                                                                                                        | 3.1 to 6.1 | Wilcoxon rank sum: $z = 1.05$ , $p = 0.29$ |
| Child gender (% male) | 46.8% ( <i>n</i> = 79) [0]                                                                                               | Not applicable (n/a)       | 51.9% ( <i>n</i> = 304) [7]                                                                                    | n/a        | $\chi^2_{(1)} = 1.38$ , $p = 0.24$         |



|                                                            |                    |              |                     |              |                                              |
|------------------------------------------------------------|--------------------|--------------|---------------------|--------------|----------------------------------------------|
| Number of children (under 16) living in household          | 2 [1]              | 1 to 3       | 2 [4]               | 1 to 2       | Wilcoxon rank sum: $z = 2.17$ , $p = 0.030$  |
| Maternal age at birth of first child                       | 23 [10]            | 19 to 28     | 26 [43]             | 21 to 30     | Wilcoxon rank sum: $z = -4.37$ , $p < 0.001$ |
| Proportion of families with one adult per household        | 31.4% (n = 53) [0] | n/a          | 17.7% (n = 104) [4] | n/a          | $\chi^2_{(1)} = 15.02$ , $p < 0.001$         |
| Index of multiple deprivation (IMD) 2019                   | 46.3 [5]           | 35.8 to 56.9 | 40.2 [10]           | 32.6 to 52.8 | Wilcoxon rank sum: $z = 4.02$ , $p < 0.001$  |
| Distance to the nearest emergency department (Kilometres)† | 4.55 [2]           | 3.55 to 6.58 | 4.60 [6]            | 3.78 to 5.78 | Wilcoxon rank sum: $z = 0.53$ , $p = 0.60$   |

|                                                                    |                    |     |                     |     |                                  |
|--------------------------------------------------------------------|--------------------|-----|---------------------|-----|----------------------------------|
| Intervention or control (% intervention)                           | 54.4% (n = 92) [0] | n/a | 45.4% (n = 269) [0] | n/a | $\chi^2_{(1)} = 4.34, p < 0.037$ |
| Primary outcome (% meeting primary outcome definition) at baseline | 29.0% (n = 49) [0] | n/a | 30.5% (n = 180) [3] | n/a | $\chi^2_{(1)} = 0.14, p = 0.705$ |
